# Supplementary material for: Determinants of photochemical characteristics of the photosynthetic electron transport chain of maize
Source: Front Plant Sci. 2023 Nov 20;14:1279963. doi: 10.3389/fpls.2023.1279963 (PMC10694277; doi:10.3389/fpls.2023.1279963)
Supplement: Supplementary file 1 [file DataSheet_1.docx]

Figure S1 The relationships between redox parameters and leaf characteristics during summer maize growth. (A1): *U*-specific leaf weight; (B1): *U*-P; (C1): *R1*-specific leaf weight; (D1): *R1*-leaf thickness; (E1): *R1*-N; (F1): *R1*-P; (G1): *R1*-Ca; (H1): *R2*-K; (I1): *qr*-leaf thickness; (J1): *qr*-K; (K1): *qr*-Ca; (L1): *aq*-leaf thickness; (M1): *aq*-N; (N1): *aq*-P; (O1): *aq*-K; (P1): *aq*-Ca; (Q1): *ET*-specific leaf weight; (R1): *ET*-leaf thickness; (S1): *ET*-N; (T1): *ET*-K; (U1): *ET*-Ca; (V1): *bs*-specific leaf weight; (W1): *bs*-leaf thickness; (X1): *bs*-N; (Y1): *bs*-K; (Z1): *bs*-Ca; (A2): *cs*-specific leaf weight; (B2): *cs*-N; (C2): *cs*-P; (D2): *cs*-K.

Figure S2 The relationships among redox parameters during summer maize growth. (A): *aq*-*R1*; (B): *aq*-*qr*; (C): *aq*-*ET*; (D): *bs*-*U*; (E): *bs*-*R1*; (F): *bs*-*R2*; (G): *bs*-*ET*; (H): *ET*-*U*; (I): *ET*-*R2*; (J): *ET*-*qr*; (K): *ET* -*cs*; (L): *U*-*R1*; (M): *U*-*qr*; (N): *U*-*cs*; (O): *R1*-*R2*; (P): *R1*-*qr*; (Q): *R1*-*cs*; (R): *R2*-*qr*; (S): *R2*-*cs*; (T): *qr*-*cs*.
